# Supplementary material for: 5′ tRNA halves are highly expressed in the primate hippocampus and might sequence-specifically regulate gene expression
Source: PubMed Central journal article supplement — RNA. 2020 Jun;26(6):694–707. doi: 10.1261/rna.073395.119 (PMC7266158; doi:10.1261/rna.073395.119), 2020-06
Supplement: supp_073395.119_Supplemental_Fig_S5.pdf [file supp_073395.119_Supplemental_Fig_S5.pdf]

**A****original k-mers**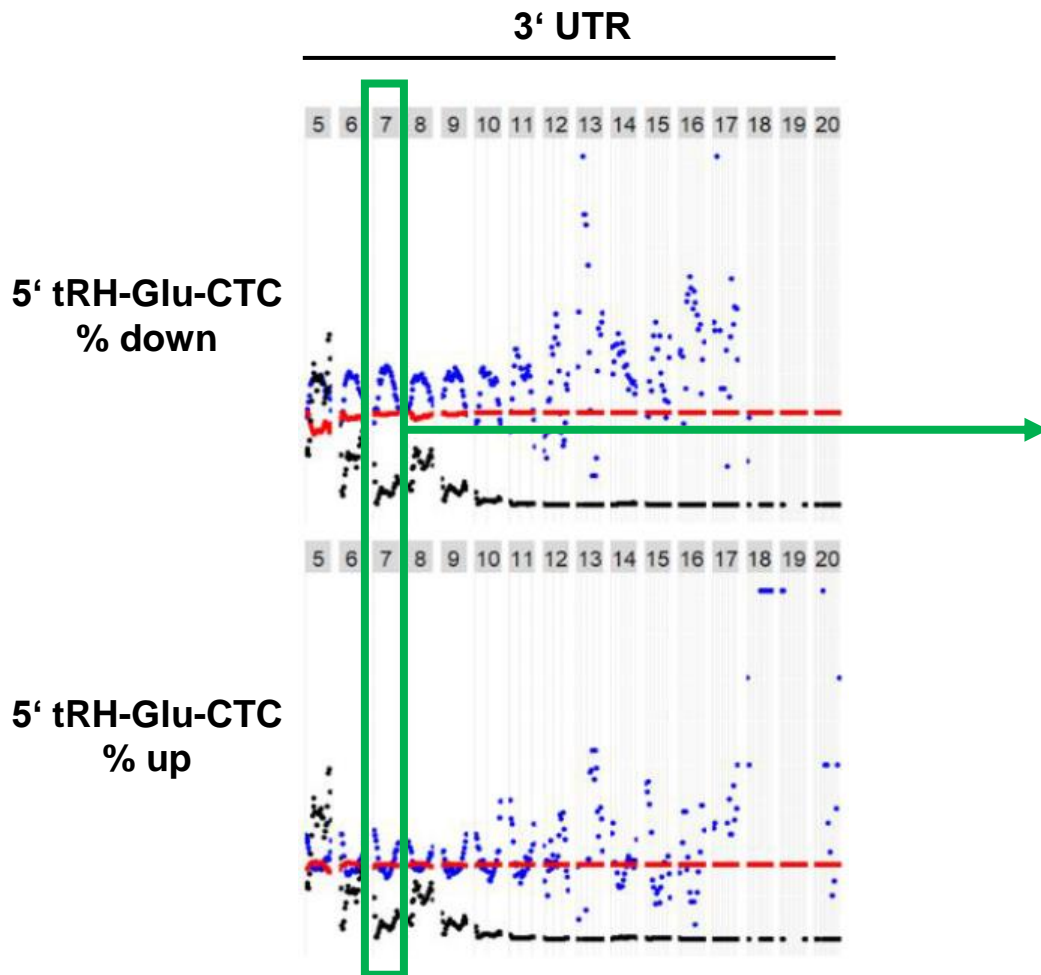**A.1** 7mers from the 5'end of tRH targeting 3'UTR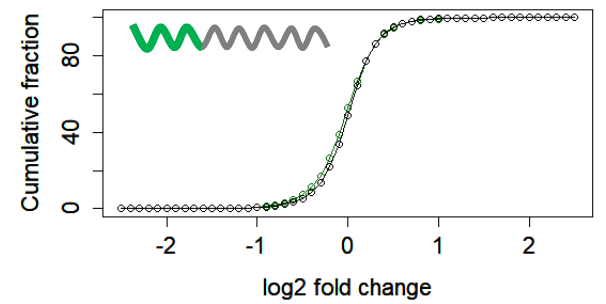**A.2** 7mers from the middle of tRH targeting 3'UTR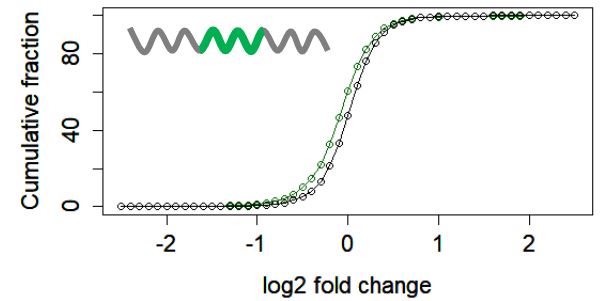**A.3** 7mers from the 3'end of tRH targeting 3'UTR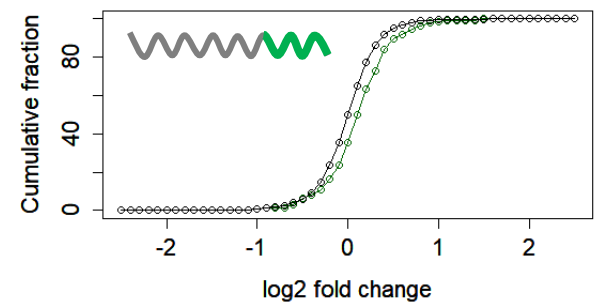**B****random shuffled k-mers**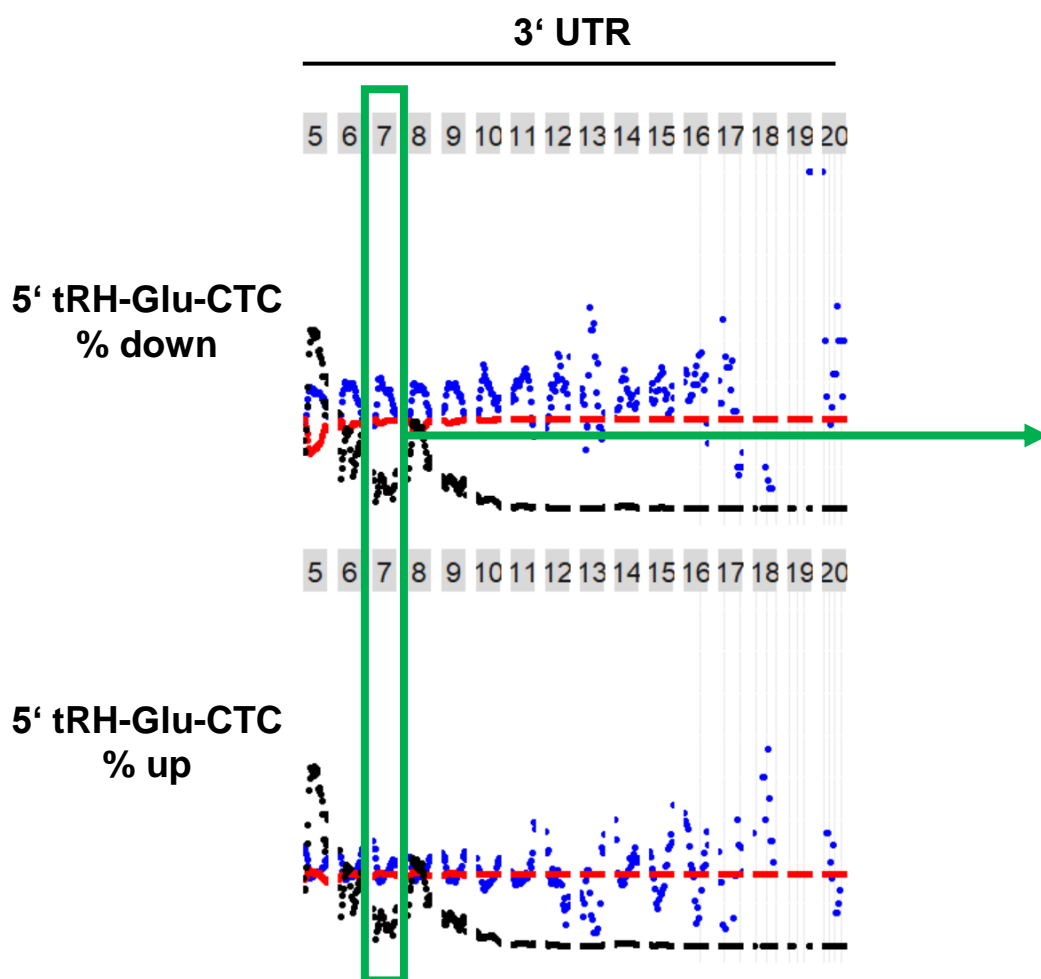**B.1** 7mers from the 5'end of tRH targeting 3'UTR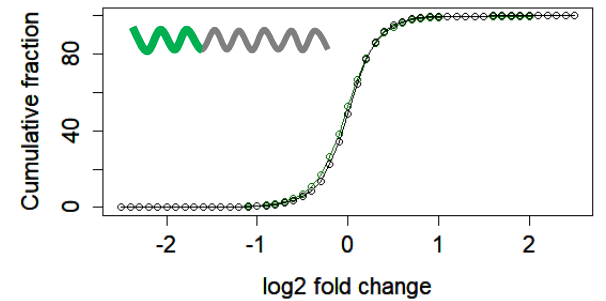**B.2** 7mers from the middle of tRH targeting 3'UTR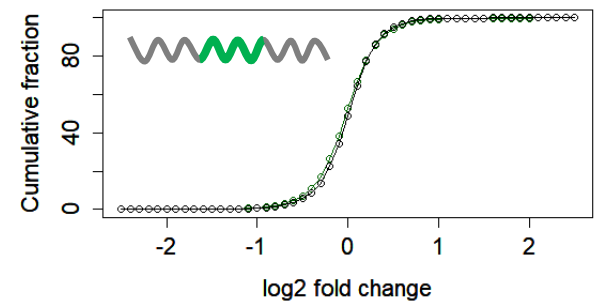**B.3** 7mers from the 3'end of tRH targeting 3'UTR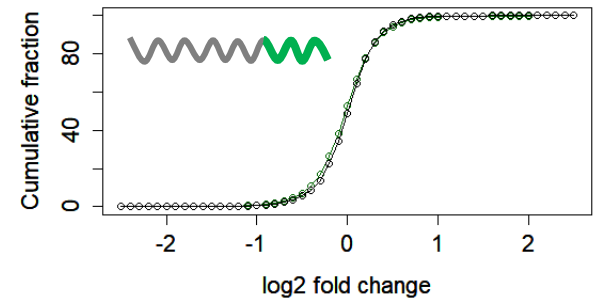

Supplemental\_Fig\_S5: Control of k-mer analysis. Target pattern analysis with **(A)** original k-mers of 5' tRH-Glu-CTC and **(B)** random shuffled k-mers that were mapped to the 3' UTR of the human transcriptome with cumulative fraction plots of genes that have target sites for the respective 7-mers (green).
