# Supplementary material for: 5′ tRNA halves are highly expressed in the primate hippocampus and might sequence-specifically regulate gene expression
Source: PubMed Central journal article supplement — RNA. 2020 Jun;26(6):694–707. doi: 10.1261/rna.073395.119 (PMC7266158; doi:10.1261/rna.073395.119), 2020-06
Supplement: supp_073395.119_Supplemental_Fig_S6.pdf [file supp_073395.119_Supplemental_Fig_S6.pdf]

```
human 5' tRH-Glu-CTC TCCCTGGTGGTCTAGTGGTTAGGATTCGGCGCT
fly 5' tsRNA-Glu-CTC T-----ATTGTCTAGTGGTTAGGAT-----
*                *  *****(*****

```

Supplemental\_Fig\_S6: Sequence alignment between human and fly 5' tsRNA-Glu-CTC.
